# Supplementary material
Source: PubMed Central journal article supplement (PMC3781984)
Supplement: 2cff39e439b4762534642c164c3c365f_genetics.113.152744-7.pdf [file 2cff39e439b4762534642c164c3c365f_genetics.113.152744-7.pdf]

### Frequency of nucleotides surrounding *in vivo* integration that occurred upstream of ORFs

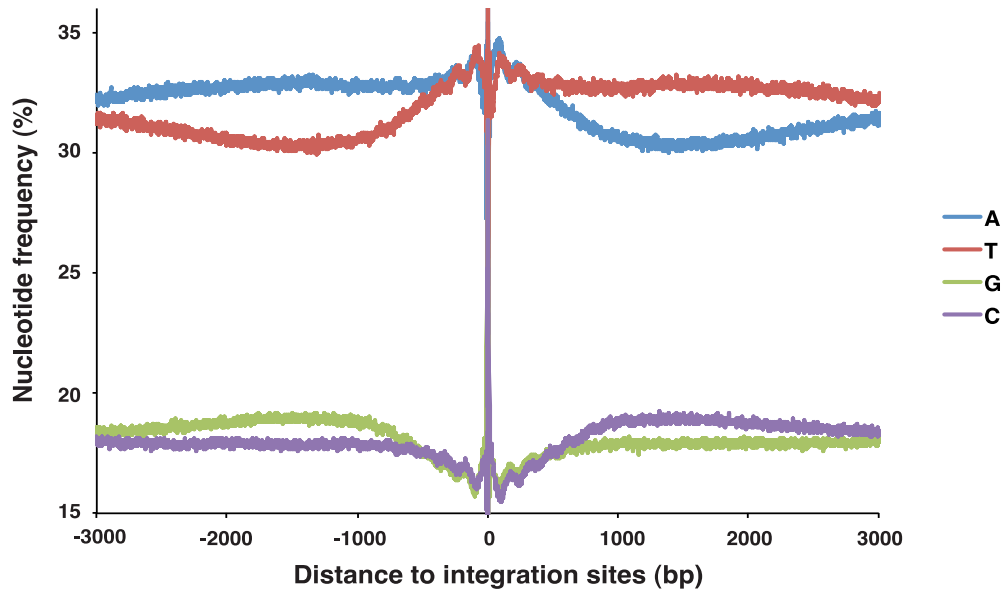

**Figure S4** The average nucleotide frequencies were determined for the positions on either side of the *in vivo* insertion sites that occurred upstream of ORFs. The insertion sites were aligned and the nucleotide frequencies were calculated for a window that extended 3.0 kb on both sides.
