# Supplementary material
Source: PubMed Central journal article supplement (PMC3781984)
Supplement: 2d712643b262ddacf2edfa04d842e5ef_genetics.113.152744-1.pdf [file 2d712643b262ddacf2edfa04d842e5ef_genetics.113.152744-1.pdf]

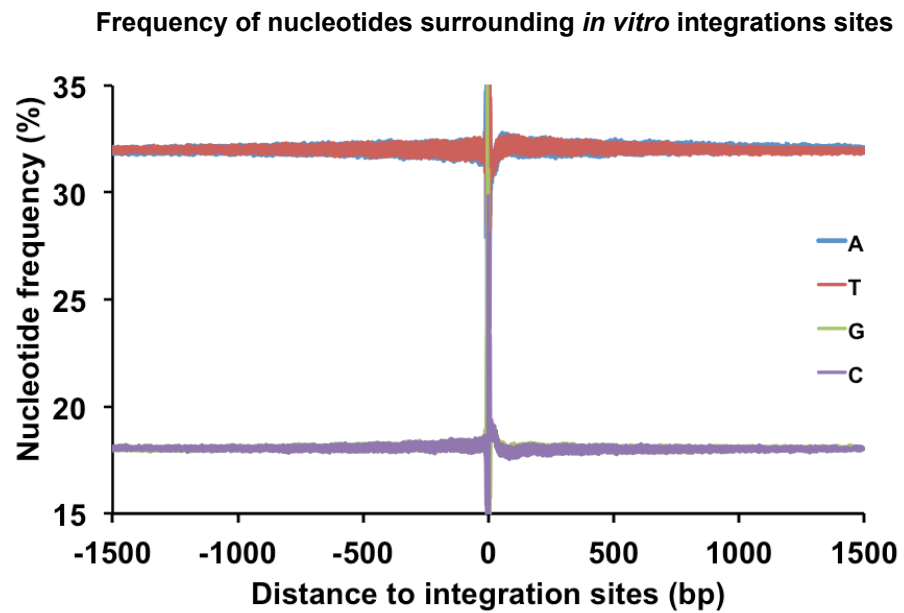

**Figure S3** The average nucleotide frequencies were determined for the positions on either side of the *in vitro* insertion sites. The insertion sites were aligned and the nucleotide frequencies were calculated for a window that extended 1.5 kb on both sides.
