# Supplementary material
Source: PubMed Central journal article supplement (PMC3781984)
Supplement: 010b3f400a9b28543b0122c0059daaed_genetics.113.152744-4.pdf [file 010b3f400a9b28543b0122c0059daaed_genetics.113.152744-4.pdf]

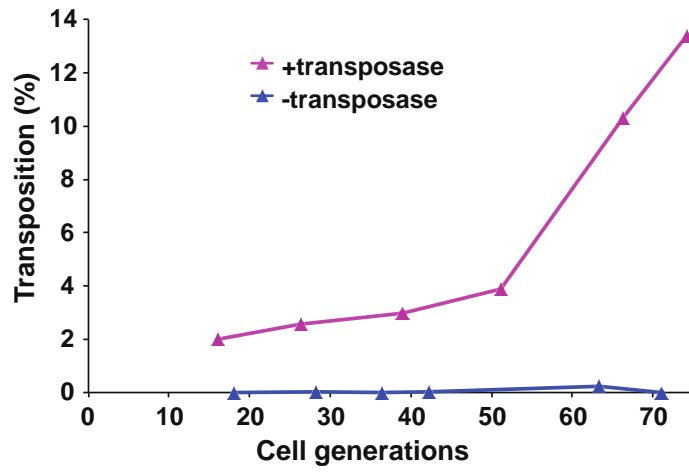

**Figure S1** The percentage of cells with an insertion was measured during prolonged growth in liquid culture. After 74 generations 13.4% of the cells expressing the transposase contained an insertion (Pink). Cells in a control culture did not express the transposase (Blue).
