# Supplementary material
Source: PubMed Central journal article supplement (PMC3781984)
Supplement: 30dac2cab30711e5d65e53c0f21d00ec_genetics.113.152744-3.pdf [file 30dac2cab30711e5d65e53c0f21d00ec_genetics.113.152744-3.pdf]

Table S3

## Test of deletion strains version 2.0 for presence of ORFs designated by the consortium to be nonessential.

| chromosome | gene                              | start   | end     | strand | Number of integrations | Density (integration/kb /million insertions) | Gene description                                      | bands in colony PCR | bands with the same primers in wt. | ORF detected on Southern blot |
|------------|-----------------------------------|---------|---------|--------|------------------------|----------------------------------------------|-------------------------------------------------------|---------------------|------------------------------------|-------------------------------|
| chr1       | rp136a SPAC15E1.03 rpl42          | 3722509 | 3723019 | +      | 0                      | 0.00                                         | 60S ribosomal protein L36/L42                         | 2                   | 2                                  | √                             |
| chr1       | ubi1 SPAC11G7.04                  | 3969009 | 3969395 | +      | 0                      | 0.00                                         | ribosomal-ubiquitin fusion protein Ubi1               | 1                   | 2                                  |                               |
| chr1       | SPAC186.06                        | 5542419 | 5542973 | +      | 0                      | 0.00                                         | human MAWBP homolog                                   | 0                   | 2                                  |                               |
| chr2       | smd3 SPBC19C2.14                  | 1702182 | 1702628 | +      | 0                      | 0.00                                         | Sm snRNP core protein Smd3                            | 2                   | 2                                  |                               |
| chr2       | SPBC16A3.16                       | 4267784 | 4268090 | -      | 0                      | 0.00                                         | mitochondrial inner membrane protein                  | 0                   | 2                                  |                               |
| chr3       | SPCC14G10.03c ump1                | 748037  | 748530  | -      | 0                      | 0.00                                         | proteasome maturation factor Ump1                     | 1                   | 2                                  |                               |
| chr3       | SPCC162.01c                       | 1587869 | 1588603 | +      | 0                      | 0.00                                         | RNA-binding protein                                   | 2                   | 2                                  |                               |
| chr1       | rhp54 rad54 SPAC15A10.03c         | 3680587 | 3683145 | -      | 1                      | 1.08                                         | Rad54 homolog Rhp54                                   | 0                   | 2                                  |                               |
| chr2       | SPBC577.06c                       | 758408  | 764229  | -      | 4                      | 1.91                                         | phosphatidylinositol kinase                           | 2                   | 2                                  |                               |
| chr2       | tif213 SPBC17G9.09                | 2187712 | 2189052 | +      | 1                      | 2.07                                         | translation initiation factor eIF2 gamma subunit      | 2                   | 2                                  | √                             |
| chr2       | arp5 SPBC365.10                   | 2512667 | 2514887 | +      | 2                      | 2.50                                         | actin-like protein Arp5                               | 0                   | 2                                  |                               |
| chr1       | fas1 SPAC926.09c                  | 3900367 | 3906588 | -      | 6                      | 2.67                                         | fatty acid synthase beta subunit Fas1                 | 2                   | 2                                  |                               |
| chr1       | SPAC186.03                        | 5535198 | 5536280 | +      | 1                      | 2.56                                         | L-asparaginase                                        | 1                   | 1                                  |                               |
| chr1       | nup184 SPAP27G11.10c              | 1625076 | 1629841 | -      | 6                      | 3.49                                         | nucleoporin Nup184                                    | 1                   | 1                                  |                               |
| chr1       | spt6 SPAC694.07c SPAC1F7.01c      | 4212706 | 4216803 | -      | 6                      | 4.06                                         | transcription elongation factor Spt6                  | 2                   | 2                                  | √                             |
| chr3       | bgs4 orb11 cwg1 SPCC1840.02c      | 2249279 | 2255146 | -      | 9                      | 4.25                                         | 1,3-beta-glucan synthase subunit Bgs4                 | 2                   | 2                                  |                               |
| chr2       | gpd1 SPBC215.05                   | 4035814 | 4036971 | +      | 2                      | 4.79                                         | glycerol-3-phosphate dehydrogenase Gpd1               | 0                   | 1                                  |                               |
| chr3       | tif6 SPCC1919.09                  | 2223154 | 2224257 | +      | 2                      | 5.03                                         | translation initiation factor eIF6                    | 0                   | 2                                  | √                             |
| chr1       | pub1 SPAC11G7.02                  | 3963323 | 3965870 | +      | 5                      | 5.44                                         | ubiquitin-protein ligase E3                           | 1                   | 2                                  |                               |
| chr2       | atp16 SPBC13E7.04                 | 3046873 | 3047355 | +      | 1                      | 5.74                                         | F1-ATPase delta subunit                               | 2                   | 2                                  |                               |
| chr2       | SPBC1539.08 arf6                  | 4375857 | 4376810 | +      | 2                      | 5.82                                         | ADP-ribosylation factor, Arf family                   | 1                   | 2                                  |                               |
| chr2       | SPBC27B12.08                      | 1335724 | 1341821 | +      | 13                     | 5.91                                         | AP-1 accessory protein                                | 0                   | 1                                  |                               |
| chr1       | arp42 arp4 SPAC23D3.09            | 4353826 | 4355118 | -      | 3                      | 6.44                                         | SWI/SNF and RSC complex subunit Arp42                 | 0                   | 2                                  |                               |
| chr1       | SPAC869.04                        | 5511137 | 5512369 | -      | 3                      | 6.75                                         | formamidase-like protein                              | 1                   | 2                                  |                               |
| chr2       | ypl7 SPBC405.04c                  | 3147478 | 3148230 | -      | 2                      | 7.37                                         | GTPase Ypl7                                           | 1                   | 1                                  |                               |
| chr1       | vps28 SPAC1B3.07c                 | 4940690 | 4941436 | -      | 2                      | 7.43                                         | ESCRT I complex subunit Vps28                         | 0                   | 2                                  |                               |
| chr3       | SPCC5E4.10c                       | 651622  | 651994  | -      | 1                      | 7.44                                         | sequence orphan                                       | 0                   | 2                                  |                               |
| chr2       | wis1 spc2 smf2 SPBC409.07c        | 1143967 | 1145784 | -      | 5                      | 7.63                                         | MAP kinase kinase Wis1                                | 2                   | 2                                  |                               |
| chr1       | ies6 SPAC222.04c                  | 950298  | 950651  | -      | 1                      | 7.84                                         | chromatin remodeling complex subunit Ies6             | 2                   | 2                                  |                               |
| chr1       | SPAC664.13                        | 1729505 | 1729858 | +      | 1                      | 7.84                                         | sequence orphan                                       | 2                   | 2                                  |                               |
| chr2       | SPBPB10D8.01                      | 81295   | 82953   | +      | 5                      | 8.36                                         | cysteine transporter                                  | 0                   | 2                                  |                               |
| chr3       | rpt4 SPCC1682.16                  | 405612  | 407251  | +      | 5                      | 8.46                                         | 19S proteasome regulatory subunit Rpt4                | 2                   | 2                                  | √                             |
| chr2       | sec63 SPBC36B7.03                 | 2387093 | 2389038 | +      | 6                      | 8.55                                         | ER protein translocation subcomplex subunit Sec63     | 2                   | 2                                  | √                             |
| chr1       | SPAC20G8.09c                      | 1415542 | 1418750 | -      | 10                     | 8.64                                         | N-acetyltransferase Nat10                             | 2                   | 2                                  |                               |
| chr2       | mcs4 SPBC887.10                   | 3557274 | 3558842 | +      | 5                      | 8.84                                         | two-component response regulator                      | 0                   | 2                                  |                               |
| chr2       | SPBC9B6.07                        | 1824562 | 1825497 | +      | 3                      | 8.89                                         | nucleolar protein Nop52 family                        | 0                   | 2                                  |                               |
| chr1       | plc1 SPAC22F8.11                  | 4807786 | 4810485 | +      | 9                      | 9.25                                         | phosphoinositide phospholipase C Plc1                 | 2                   | 2                                  |                               |
| chr3       | ekc1 SPCC777.16c SPCC663.01c      | 1626547 | 1629120 | -      | 16                     | 17.24                                        | protein phosphatase regulatory subunit Ekc1           | 2                   | 2                                  |                               |
| chr1       | mcl1 slr3 SPAPB1E7.02c            | 3283195 | 3285745 | -      | 16                     | 17.40                                        | DNA polymerase alpha accessory factor Mcl1            | 0                   | 2                                  |                               |
| chr2       | swi5 SPBC409.03                   | 1138056 | 1138530 | +      | 3                      | 17.52                                        | Swi5 protein                                          | 1                   | 1                                  |                               |
| chr3       | pof3 SPCC338.16                   | 1345394 | 1347127 | -      | 11                     | 17.60                                        | F-box protein Pof3                                    | 0                   | 2                                  |                               |
| chr1       | SPAC6F6.03c                       | 2734109 | 2736126 | -      | 13                     | 17.87                                        | ribosome export GTPase                                | 2                   | 2                                  |                               |
| chr3       | SPCC1919.04                       | 2211103 | 2211873 | +      | 5                      | 17.99                                        | sequence orphan                                       | 1                   | 2                                  |                               |
| chr1       | SPAC16C9.05 cph1                  | 799550  | 800764  | +      | 8                      | 18.26                                        | PHD finger containing protein                         | 2                   | 2                                  |                               |
| chr2       | SPBC119.12                        | 740275  | 741480  | +      | 8                      | 18.40                                        | Golgi matrix protein                                  | 0                   | 2                                  |                               |
| chr2       | lsd1 SPBC146.09c swm1 saf110      | 1016000 | 1019002 | -      | 20                     | 18.47                                        | histone demethylase SWIRM1                            | 2                   | 2                                  |                               |
| chr2       | nfs1 SPBC21D10.11c                | 2422769 | 2424265 | +      | 10                     | 18.53                                        | iron-sulfur cluster assembly protein Nfs1             | 2                   | 2                                  |                               |
| chr1       | pzh1 SPAC57A7.08                  | 1527964 | 1529511 | -      | 14                     | 20.09                                        | serine/threonine protein phosphatase Pzh1             | 0                   | 2                                  |                               |
| chr3       | set1 SPCC306.04c                  | 412765  | 415527  | -      | 25                     | 25.10                                        | histone lysine methyltransferase Set1                 | 0                   | 1                                  |                               |
| chr3       | set9 SPCC4B3.12                   | 1154281 | 1155606 | -      | 12                     | 25.10                                        | histone lysine methyltransferase Set9                 | 2                   | 2                                  |                               |
| chr2       | rad3 SPBC216.05                   | 904365  | 911525  | +      | 65                     | 25.18                                        | ATR checkpoint kinase                                 | 0                   | 2                                  |                               |
| chr2       | pdb1 SPBC30D10.13c                | 3070543 | 3071643 | +      | 10                     | 25.19                                        | pyruvate dehydrogenase e1 component beta subunit Pdb1 | 2                   | 2                                  |                               |
| chr1       | pds5 SPAC110.02                   | 1912042 | 1915659 | +      | 33                     | 25.30                                        | cohesin-associated protein Pds5                       | 0                   | 2                                  |                               |
| chr1       | cit1 SPAC6C3.04                   | 2328675 | 2330096 | +      | 13                     | 25.36                                        | citrate synthase                                      | 2                   | 2                                  |                               |
| chr3       | ccr4 SPCC31H12.08c SPCC5E4.02c    | 637461  | 639533  | -      | 19                     | 25.42                                        | CCR4-Not complex subunit Ccr4                         | 0                   | 2                                  |                               |
| chr2       | hip3 SPBC31F10.14c hir3           | 3777778 | 3782670 | -      | 45                     | 25.51                                        | HIRA interacting protein Hip3                         | 0                   | 2                                  |                               |
| chr2       | SPBC1685.04                       | 502873  | 503850  | +      | 9                      | 25.53                                        | sequence orphan                                       | 0                   | 1                                  |                               |
| chr2       | SPBC30D10.14                      | 3067996 | 3068745 | -      | 9                      | 33.29                                        | dienelactone hydrolase family                         | 0                   | 2                                  |                               |
| chr3       | SPCC645.13                        | 1258634 | 1260799 | +      | 26                     | 33.30                                        | transcription elongation regulator                    | 0                   | 2                                  |                               |
| chr3       | SPCC569.07                        | 2415649 | 2417061 | -      | 17                     | 33.37                                        | aromatic aminotransferase                             | 0                   | 2                                  |                               |
| chr1       | atp2 SPAC222.12c                  | 968783  | 970360  | -      | 19                     | 33.40                                        | F1-ATPase beta subunit                                | 2                   | 2                                  |                               |
| chr2       | SPBC1A4.05                        | 1984516 | 1986671 | +      | 26                     | 33.45                                        | sequence orphan                                       | 1                   | 2                                  |                               |
| chr1       | spo15 SPAC1F3.06c                 | 625430  | 631303  | +      | 71                     | 33.53                                        | sporulation protein Spo15                             | 0                   | 2                                  |                               |
| chr1       | fh11 SPAC1142.08 SPAC8C9.01       | 3639988 | 3642219 | +      | 27                     | 33.55                                        | fork head transcription factor Fh11                   | 0                   | 2                                  |                               |
| chr2       | amo1 SPBC15D4.10c                 | 3028705 | 3030192 | -      | 18                     | 33.55                                        | nuclear rim protein Amo1                              | 1                   | 2                                  |                               |
| chr1       | hem2 SPAC1805.06c                 | 2783941 | 2784930 | -      | 12                     | 33.62                                        | porphobilinogen synthase Hem2                         | 2                   | 2                                  |                               |
| chr2       | vps13a SPBC31F10.18c SPBC21C3.01c | 3789386 | 3798703 | -      | 113                    | 33.64                                        | chorein homolog                                       | 0                   | 2                                  |                               |
| chr1       | gmh3 SPAC22E12.06c                | 5029000 | 5029998 | -      | 15                     | 41.65                                        | alpha-1,2-galactosyltransferase Gmh3                  | 0                   | 2                                  |                               |
| chr3       | SPCC1840.07c                      | 2270637 | 2271635 | -      | 15                     | 41.65                                        | phosphoprotein phosphatase                            | 0                   | 2                                  |                               |
| chr3       | SPCC622.19 jmj4 mug149            | 1438375 | 1439839 | +      | 22                     | 41.65                                        | Jmj4 protein                                          | 0                   | 2                                  |                               |
| chr1       | SPAC24C9.05c mug70                | 3045121 | 3047313 | -      | 33                     | 41.74                                        | conserved protein (fungal and plant)                  | 0                   | 2                                  |                               |
| chr1       | SPAC16E8.17c                      | 3532418 | 3533413 | -      | 15                     | 41.77                                        | succinate-CoA ligase                                  | 0                   | 1                                  |                               |
| chr1       | SPAC31A2.12                       | 412084  | 413874  | +      | 27                     | 41.82                                        | arrestin/PY protein 1                                 | 0                   | 2                                  |                               |
| chr1       | msh3 swi4 SPAC8F11.03             | 2855931 | 2858980 | +      | 46                     | 41.83                                        | MutS protein homolog 3                                | 0                   | 2                                  |                               |
| chr2       | SPBC1773.16c                      | 318693  | 320480  | -      | 27                     | 41.89                                        | transcription factor                                  | 0                   | 2                                  |                               |
| chr3       | SPCC1620.12c                      | 2167799 | 2169586 | -      | 27                     | 41.89                                        | GTPase activating protein                             | 0                   | 2                                  |                               |
| chr1       | ldp1 SPAC6G10.08                  | 3231599 | 3232855 | +      | 19                     | 41.93                                        | isocitrate dehydrogenase ldp1                         | 1                   | 2                                  |                               |
