# Supplementary material
Source: PubMed Central journal article supplement (PMC3781984)
Supplement: 90f454c8e13273c9e4f869cd3c83e679_genetics.113.152744-5.pdf [file 90f454c8e13273c9e4f869cd3c83e679_genetics.113.152744-5.pdf]

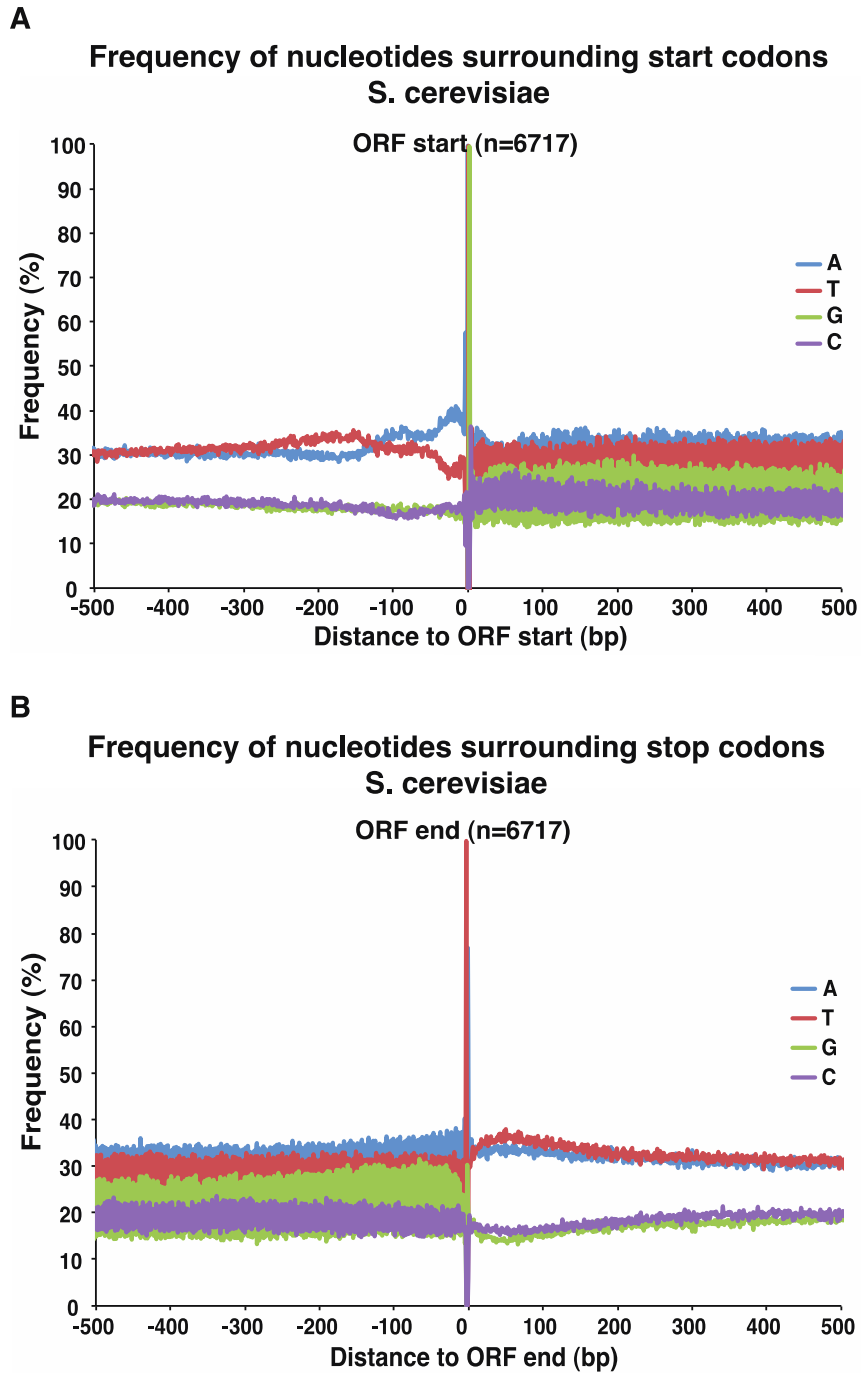

**Figure S6** The average nucleotide frequencies upstream and downstream of ORFs in *Saccharomyces cerevisiae* were determined. A. The ATGs of the *S. cerevisiae* ORFs were aligned and the nucleotide frequencies upstream of the ORFs were plotted. B. The stop codons of the *S. cerevisiae* ORFs were aligned and the nucleotides frequencies downstream were plotted.
