# Supplementary material
Source: PubMed Central journal article supplement (PMC3781984)
Supplement: 801db856c382e4215c3e0fdde00d2827_genetics.113.152744-15.pdf [file 801db856c382e4215c3e0fdde00d2827_genetics.113.152744-15.pdf]

**Table S5 Strains of *S. pombe* used in this study**

| Yeast strain | Genotype                                                                                         | Reference                                 |
|--------------|--------------------------------------------------------------------------------------------------|-------------------------------------------|
| YHL#10046    | FY243, h-cdc19-P1 ura4-D18 leu1-32 ade6-M210                                                     | Gift of Susan Forsburg                    |
| YHL240       | h+ ura4-294::neo-ura4+                                                                           | This study                                |
| YHL912       | h- leu1-32 ura4-294                                                                              | (1)                                       |
| YHL9176      | YHL912 with pHL423 and pHL2577                                                                   |                                           |
| YHL9451      | YHL912 with pHL2577                                                                              | This study                                |
| YHL9609      | YHL 9451 with pHL2578                                                                            | This study                                |
| YHL9799      | yBN146 with pHL2808                                                                              | This study                                |
| YHL9800      | yBN147 with pHL 2809                                                                             | This study                                |
| YHL9801      | yBN148 with pHL2810                                                                              | This study                                |
| YHL10044     | yBN149 with pHL2825                                                                              | This study                                |
| YHL10045     | YHL10046 with pSLF124                                                                            |                                           |
| yBN24        | h- ade6-M210/ade6-M216 ura4-D18 leu1-32<br>SPBC21C3.09c::KanMX4/ SPBC21C3.09c                    | Bioneer Corporation<br>collection BG_3108 |
| yBN146       | h+/h+ ade6-M210/ade6-M216 ura4-D18/ura4-D18 leu1-32/leu1-32<br>mmf1::KanMX4/mmf1                 | Bioneer Corporation<br>collection BG_3366 |
| yBN147       | h+/h+ ade6-M210/ade6-M216 ura4-D18/ura4-D18 leu1-32/leu1-32<br>mrpl16::KanMX4/mrpl16             | Bioneer Corporation<br>collection BG_2355 |
| yBN148       | h+/h+ ade6-M210/ade6-M216 ura4-D18/ura4-D18 leu1-32/leu1-32<br>mrpl19::KanMX4/mrpl19             | Bioneer Corporation<br>collection BG_0301 |
| yBN149       | h+/h+ ade6-M210/ade6-M216 ura4-D18/ura4-D18 leu1-32/leu1-32<br>SPBC2d10.08c::KanMX4/SPBC2d10.08c | Bioneer Corporation<br>collection BG_3334 |

1. H. L. Levin, *Mol Cell Biol* **15**, 3310 (1995).
