# Supplementary material
Source: PubMed Central journal article supplement (PMC3781984)
Supplement: 192345002133947c6eb1cba03179d146_genetics.113.152744-6.pdf [file 192345002133947c6eb1cba03179d146_genetics.113.152744-6.pdf]

**Table S6 Plasmids.**

| Plasmid | Markers   | Description                                                                                                                                                                      | Reference              |
|---------|-----------|----------------------------------------------------------------------------------------------------------------------------------------------------------------------------------|------------------------|
| pHL423  | amp, LEU2 | Rep3 <i>nmt1</i> promoter, control plasmid lacking Hermes transposase                                                                                                            | (1)                    |
| pHL2577 | amp, URA3 | Hermes donor with TIR's flanking <i>kanMX6</i>                                                                                                                                   | (2)                    |
| pHL2578 | amp, LEU2 | rep81X <i>nmt1</i> promoter expressing wt Hermes transposase                                                                                                                     | (2)                    |
| pHL2612 | amp, Ura4 | URA4 cloned into pRO322 vector                                                                                                                                                   | (3)                    |
| pHL2806 | amp, LEU2 | A 2.2 kb Hind III fragment with LEU2 from REP81X was inserted into the 9.0 kb Hind III fragment of PON177{Kim, 2010 #4464}. This plasmid allows sporulation of Bioneer diploids. | this study             |
| pHL2808 | amp, Ura4 | mmf1 gene PCR cloned into pHL2612                                                                                                                                                | this study             |
| pHL2809 | amp, Ura4 | mrpl16 gene PCR cloned into pHL2612                                                                                                                                              | this study             |
| pHL2810 | amp, Ura4 | mrpl19 gene PCR cloned into pHL2612                                                                                                                                              | this study             |
| pHL2825 | amp, Ura4 | SPBC2d10.08c gene PCR cloned into pHL2612                                                                                                                                        | this study             |
| pSLF124 | amp, Ura4 | carries genomic clone of <i>cdc19</i> to complement disruption of <i>cdc19</i> in FY243                                                                                          | gift of Susan Forsbrug |

1. K. Maundrell, *Gene* **123**, 127 (1993).
2. A. G. Evertts, C. Plymire, N. L. Craig, H. L. Levin, *Genetics* **177**, 2519 (Dec, 2007).
3. C. Adams, D. Haldar, R. T. Kamakaka, *Yeast* **22**, 1307 (Dec, 2005).
