# Supplementary material
Source: PubMed Central journal article supplement (PMC3781984)
Supplement: a7b23c6b957c77b36100158865573f56_genetics.113.152744-14.pdf [file a7b23c6b957c77b36100158865573f56_genetics.113.152744-14.pdf]

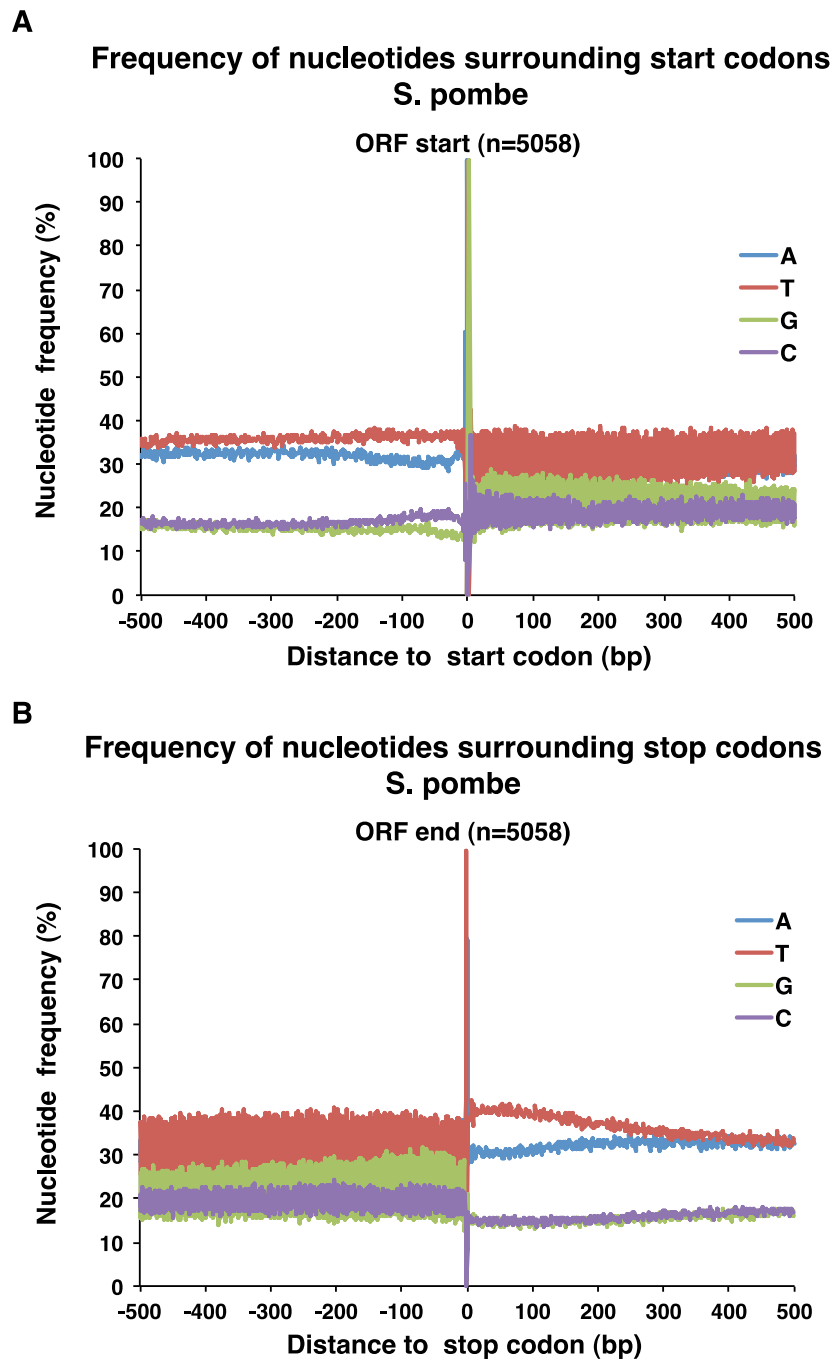

**Figure S5** The average nucleotide frequencies upstream and downstream of ORFs were determined. A. The ATGs of the *S. pombe* ORFs were aligned and the nucleotide frequencies upstream of the ORFs were plotted. B. The stop codons of the *S. pombe* ORFs were aligned and the nucleotides frequencies downstream were plotted.
