# Supplementary material
Source: PubMed Central journal article supplement (PMC3781984)
Supplement: bb2dc4de6a8d5d3d5b12bc234b82bbab_genetics.113.152744-2.pdf [file bb2dc4de6a8d5d3d5b12bc234b82bbab_genetics.113.152744-2.pdf]

**Table S1**

ORFs designated by the consortium to be essential but had high integration densities.

| Gene                        | Gene function                                                                   | integration/kb/million insertions |
|-----------------------------|---------------------------------------------------------------------------------|-----------------------------------|
| SPBC21C3.10c                | 5-amino-6-(5-phosphoribosylamino) uracil reductase                              | 161.5                             |
| tim10 SPAC222.03c           | Tim9-Tim10 complex subunit Tim10 (predicted)                                    | 130.2                             |
| mrpl16 SPBC1105.03c         | mitochondrial ribosomal protein subunit L16                                     | 128.4                             |
| SPBP8B7.05c                 | carbonic anhydrase (predicted)                                                  | 124.5                             |
| SPBC2D10.08c                | mitochondrial ribosomal protein subunit Yml6                                    | 123.5                             |
| mrpl31 SPCC16A11.11         | mitochondrial ribosomal protein subunit L31                                     | 111.6                             |
| ste11 aff1 stex SPBC32C12.0 | transcription factor Ste11                                                      | 108.4                             |
| SPAC1486.07c mrpl19         | mitochondrial ribosomal protein subunit L19                                     | 102.0                             |
| SPCC1672.01                 | histidinol-phosphatase (predicted)                                              | 100.8                             |
| SPCC2H8.04                  | sequence orphan                                                                 | 99.4                              |
| met9 met5 SPAC56F8.10       | methylenetetrahydrofolate reductase Met9                                        | 94.9                              |
| SPAC17H9.07                 | signal recognition particle subunit Srp21 (predicted)                           | 94.6                              |
| tpx1 SPCC576.03c            | thioredoxin peroxidase Tpx1                                                     | 86.2                              |
| vph2 SPCC757.10             | endoplasmic reticulum membrane involved in assembly of the V-ATPase             | 84.5                              |
| ups1 ups SPAC31G5.08        | uroporphyrinogen-III synthase Ups1                                              | 80.7                              |
| mmf1 pmf1 SPBC2G2.04c       | YjgF family protein Mmf1                                                        | 79.4                              |
| grx4 SPBC26H8.06            | glutaredoxin Grx4                                                               | 79.3                              |
| SPAC30C2.03                 | sequence orphan                                                                 | 78.9                              |
| SPBC2A9.10                  | Bin3 family                                                                     | 78.4                              |
| SPAC12B10.02c               | sequence orphan                                                                 | 78.4                              |
| mrp10 SPAC24C9.13c          | mitochondrial ribosomal protein subunit Mrp10                                   | 78.0                              |
| SPBC3B9.14c mrpl3           | mitochondrial ribosomal protein subunit L3                                      | 77.3                              |
| SPCC1682.09c                | guanine nucleotide transporter                                                  | 74.1                              |
| SPAC1002.16c                | nicotinic acid plasma membrane transporter (predicted)                          | 74.0                              |
| SPAC688.09                  | mitochondrial pyrimidine nucleotide transporter (predicted)                     | 70.9                              |
| SPBC577.09                  | ERCC-8 DNA repair homolog (predicted)                                           | 70.3                              |
| SPAC17G8.02                 | uridine ribohydrolase (predicted)                                               | 69.8                              |
| SPAC31G5.06                 | mitochondrial protein                                                           | 69.8                              |
| dea2 SPBC1198.02            | adenine deaminase Dea2                                                          | 67.8                              |
| SPCC63.10c                  | dolichol kinase (predicted)                                                     | 67.4                              |
| SPAC24C9.06c                | aconitate hydratase                                                             | 66.5                              |
| SPBC354.06 mrps16           | mitochondrial ribosomal protein subunit S16                                     | 65.5                              |
| SPBP4H10.15                 | aconitate hydratase/mitochondrial ribosomal protein subunit L49, fusion protein | 64.9                              |
| bet5 SPAC688.15 SPAC3G9.1   | TRAPP complex subunit Bet5 (predicted)                                          | 64.6                              |
| usp103 yhc1 SPBP35G2.09     | U1 snRNP-associated protein Usp103 (predicted)                                  | 63.6                              |
| crk1 mop1 mcs6 SPBC19F8.(   | cyclin-dependent kinase activating kinase Crk1                                  | 63.3                              |
| SPAPB17E12.09               | sequence orphan                                                                 | 63.2                              |
| mrp20 SPAC31A2.08           | mitochondrial ribosomal protein subunit L23 (predicted)                         | 62.8                              |
| fta3 SPBP8B7.12c sma3       | Sim4 and Mal2 associated (4 and 2 associated) protein 3                         | 62.8                              |
| SPBC887.07 mrpl38           | mitochondrial ribosomal protein subunit L38                                     | 62.7                              |
| SPBC2F12.10                 | mitochondrial ribosomal protein subunit L35                                     | 62.3                              |
| SPCC4B3.09c                 | mitochondrial ribosomal protein subunit L12                                     | 62.1                              |
| SPAPB24D3.06c               | DUF1749 family protein                                                          | 61.3                              |
| SPBC119.18                  | mitochondrial distribution and morphology protein Mdm35 (predicted)             | 61.2                              |
| SPBC17G9.13c                | sequence orphan                                                                 | 61.1                              |
| SPAC2F7.15 rsm24            | mitochondrial ribosomal protein subunit S24 (predicted)                         | 60.9                              |
| SPBC16H5.15                 | conserved fungal protein                                                        | 60.9                              |
| SPCC1393.11                 | mitochondrial ribosomal protein subunit L20                                     | 60.7                              |
| sum2 SPBC800.09             | G2/M transition checkpoint protein Sum2                                         | 60.6                              |
| alr2 SPBC359.02             | alanine racemase Alr2                                                           | 59.8                              |
| SPAC3A12.19                 | mitochondrial ribosomal protein subunit L27                                     | 59.4                              |
